# Supplementary material for: Plin2-deficiency reduces lipophagy and results in increased lipid accumulation in the heart
Source: PubMed Central journal article supplement (PMC6502866; doi:10.1038/s41598-019-43335-y), 2019-05-06
Supplement: 41598_2019_43335_MOESM1_ESM.pdf [file 41598_2019_43335_MOESM1_ESM.pdf]

## SUPPLEMENTARY INFORMATION

### **Plin2-deficiency reduces lipophagy and results in increased lipid accumulation in the heart**

Ismena Mardani<sup>1</sup>, Knut Tomas Dalen<sup>2</sup>, Christina Drevinge<sup>1</sup>, Azra Miljanovic<sup>1</sup>, Marcus Ståhlman<sup>1</sup>, Martina Klevstig<sup>1</sup>, Margareta Scharin Täng<sup>1</sup>, Per Fogelstrand<sup>1</sup>, Max Levin<sup>1</sup>, Matias Ekstrand<sup>1</sup>, Syam Nair<sup>3</sup>, Björn Redfors<sup>1</sup>, Elmir Omerovic<sup>1</sup>, Linda Andersson<sup>1</sup>, Alan R. Kimmel<sup>4</sup>, Jan Borén<sup>1</sup> and Malin C. Levin<sup>1#</sup>

<sup>1</sup>Department of Molecular and Clinical Medicine / Wallenberg Laboratory, Institute of Medicine, the Sahlgrenska Academy at University of Gothenburg and Sahlgrenska University Hospital. <sup>2</sup>Department of Nutrition, Institute of Basic Medical Sciences, University of Oslo, Oslo, Norway. <sup>3</sup> Centre of Perinatal Medicine and Health, Institute of Neuroscience and Physiology, the Sahlgrenska Academy at University of Gothenburg, Sweden. <sup>4</sup>Laboratory of Cellular and Developmental Biology, National Institute of Diabetes and Digestive and Kidney Diseases, National Institutes of Health, Bethesda, MD, USA.

#Correspondence to:

Malin Levin, Wallenberg Laboratory, Sahlgrenska University Hospital  
413 45 Gothenburg, SWEDEN, [malin.levin@wlab.gu.se](mailto:malin.levin@wlab.gu.se), phone no: +46-31-342 4153.

# Figure S1

## A

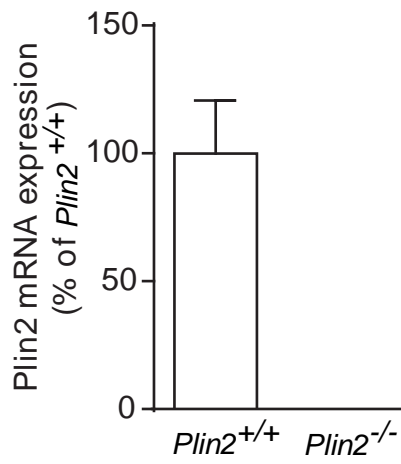

## B

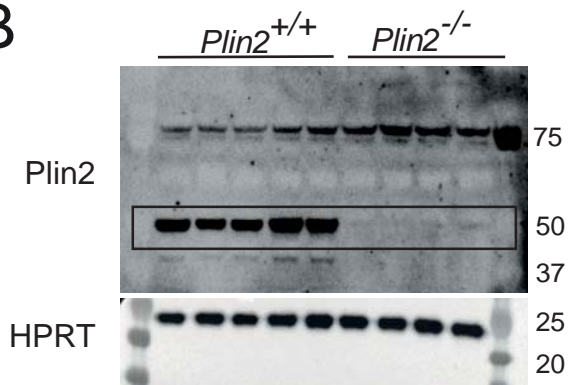

**Figure S1. Characterization of *Plin2*<sup>-/-</sup> mice.** (A) Quantitative real-time PCR of *Plin2* mRNA in hearts of *Plin2*<sup>+/+</sup> and *Plin2*<sup>-/-</sup> mice (n=5). (B) Immunoblot analysis of *Plin2* protein lysates from hearts of *Plin2*<sup>+/+</sup> and *Plin2*<sup>-/-</sup> mice, 4 hours after fasting (n=4-5). Data presented as mean±SEM.

# Figure S2

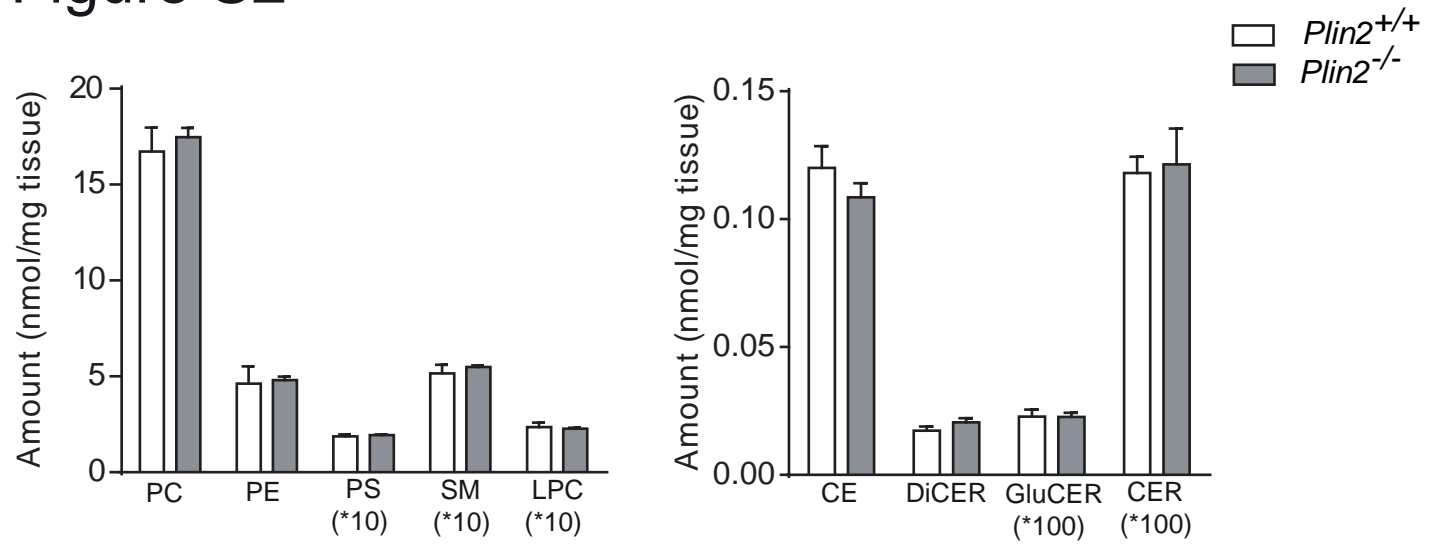

**Figure S2. Lipid content in hearts of *Plin2*<sup>-/-</sup> and *Plin2*<sup>+/+</sup> mice.** After a 4 hours fast (n=6-7), data presented as mean±SEM. PC, phosphatidylcholine; PE, phosphatidylethanolamine; PS, phosphatidylserine; SM, sphingomyelin; LPC, lysophosphatidylcholine; CE, cholesterol esters; CER, ceramide; DiCER, dihydroceramide; GluCER, glycosylceramide.

# Figure S3

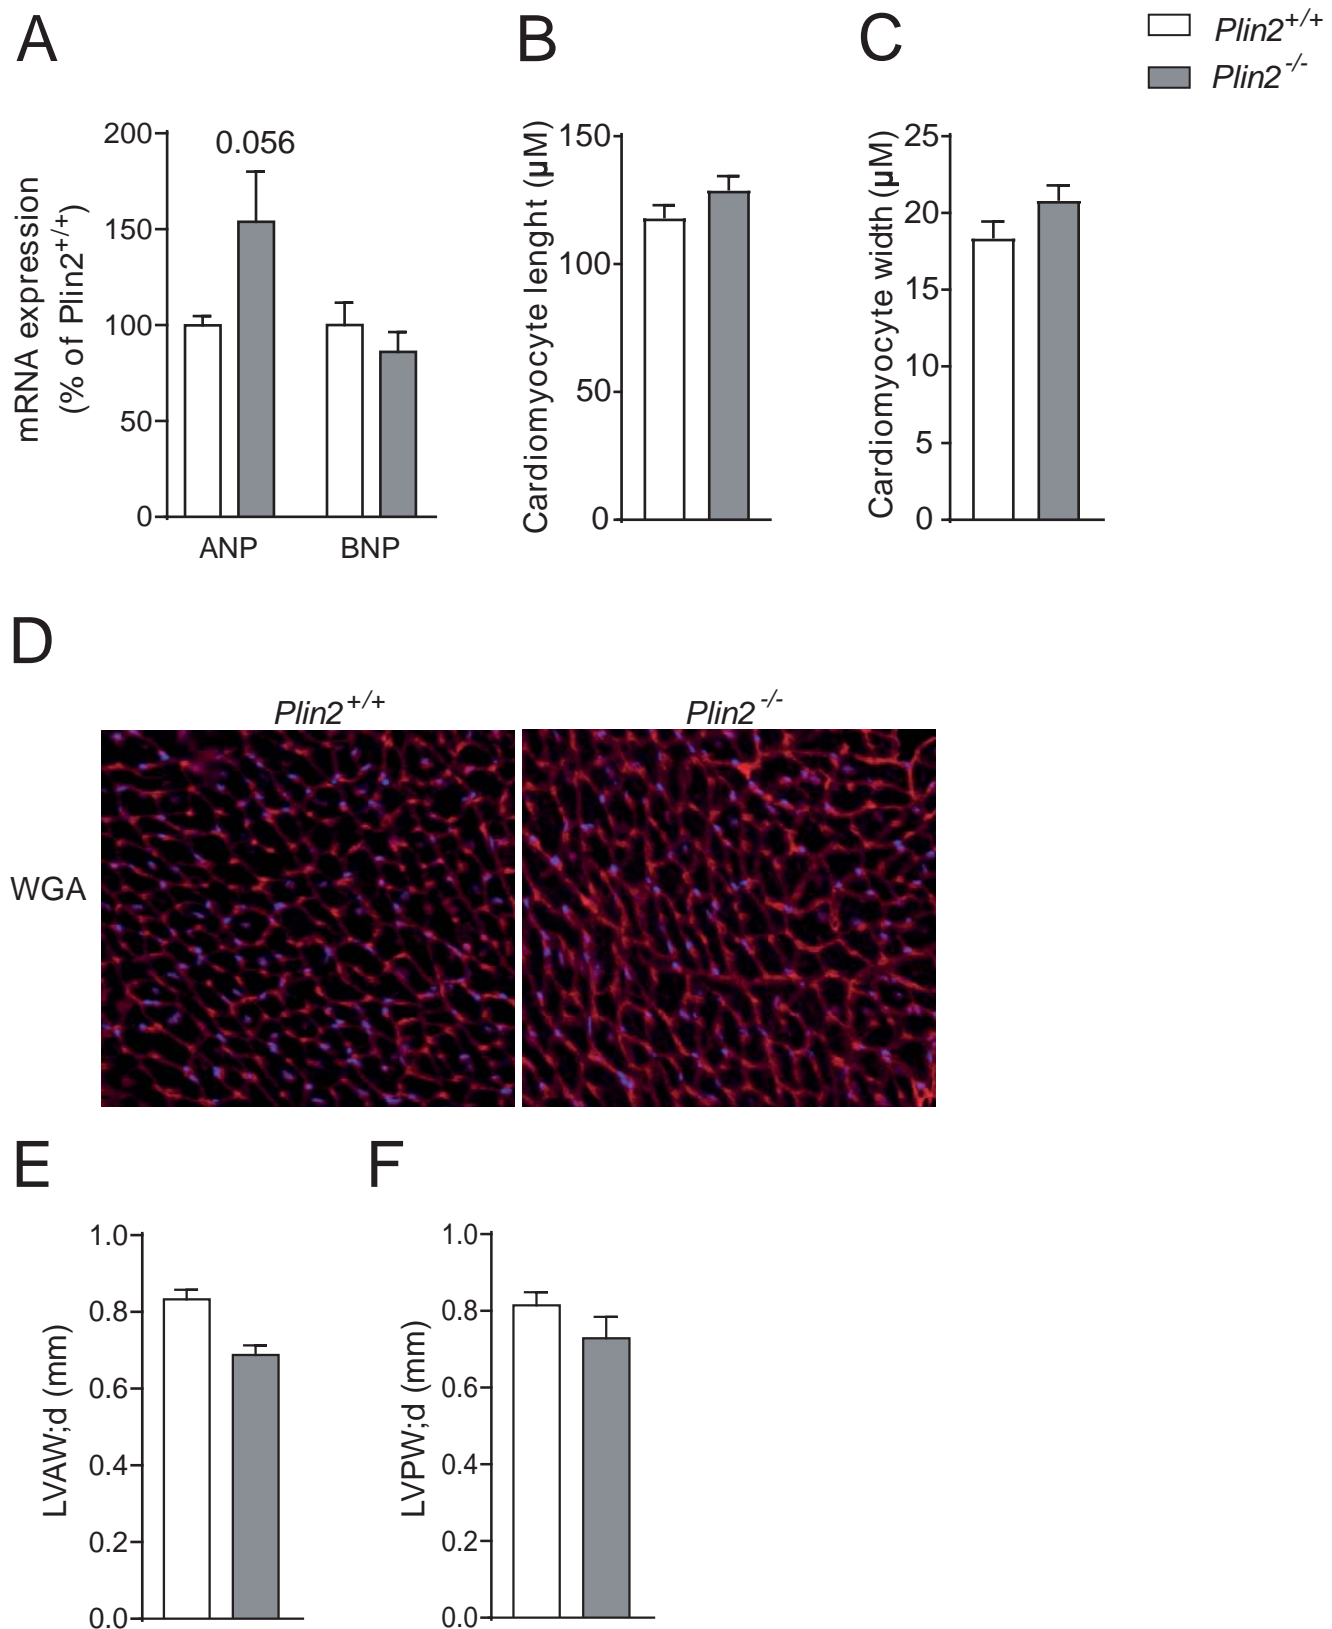

**Figure S3. Natriuretic peptide expression and heart dimensions in *Plin2*<sup>+/+</sup> and *Plin2*<sup>-/-</sup> mice.**

(A) Quantitative real-time PCR of *Plin2* mRNA in hearts of *Plin2*<sup>+/+</sup> and *Plin2*<sup>-/-</sup> mice (n=5).

(B-C) Cardiomyocyte length and width (μM) (n=4-5). (D) Representative WGA staining of heart sections from

*Plin2*<sup>+/+</sup> and *Plin2*<sup>-/-</sup> mice. (E) Left ventricle anterior wall thickness in diastole (LVAW;d) and (F) left ventricle posterior wall thickness in diastole (LVPW;d) in *Plin2*<sup>+/+</sup> and *Plin2*<sup>-/-</sup> mice (n=3). Data presented as mean±SEM.

# Figure S4

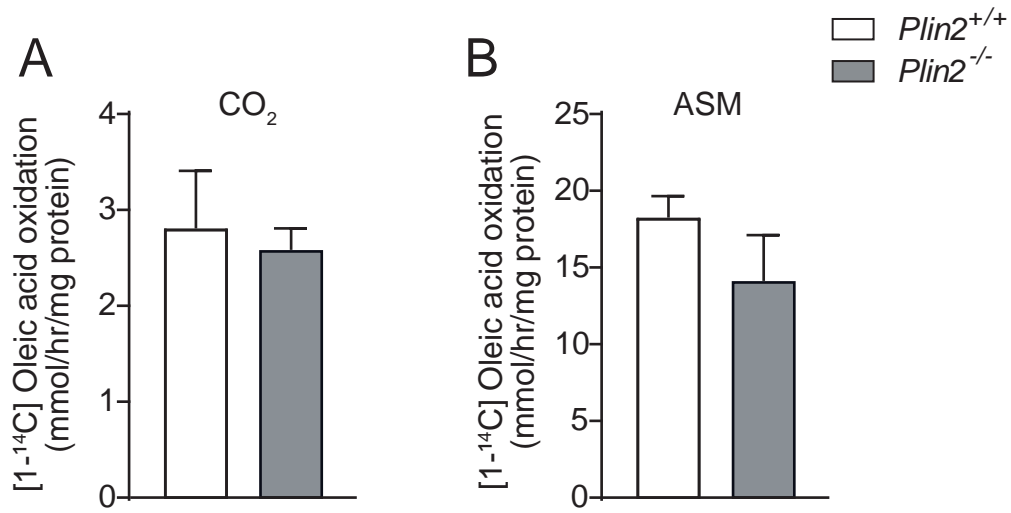

**Figure S4. Fatty acid oxidation in *Plin2*<sup>+/+</sup> and *Plin2*<sup>-/-</sup> hearts.** Produced (A) CO<sub>2</sub> and (B) ASM (n=3). Data presented as mean±SEM.

## Figure S5

### A

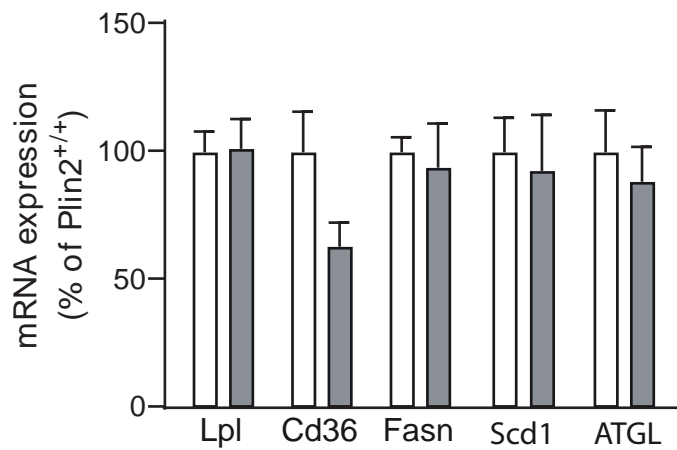

### B

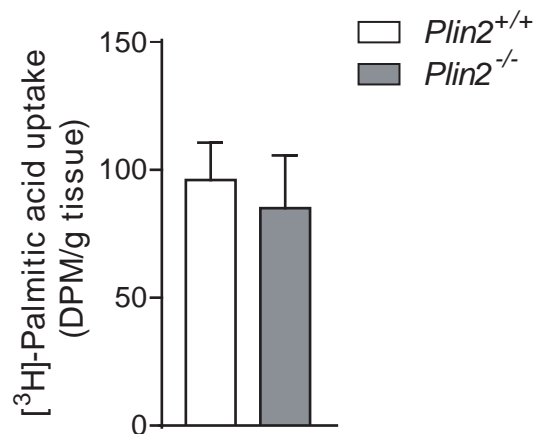

**Figure S5. Markers of lipolysis and lipogenesis and lipid uptake in *Plin2*<sup>+/+</sup> and *Plin2*<sup>-/-</sup> hearts.** (A) mRNA expression of Lpl, Cd36, Fasn, Scd1 and ATGL (n=4). (B) [<sup>3</sup>H]-Palmitic acid uptake in *Plin2*<sup>+/+</sup> and *Plin2*<sup>-/-</sup> hearts (n=2-4). Data presented as mean±SEM.

# Figure S6

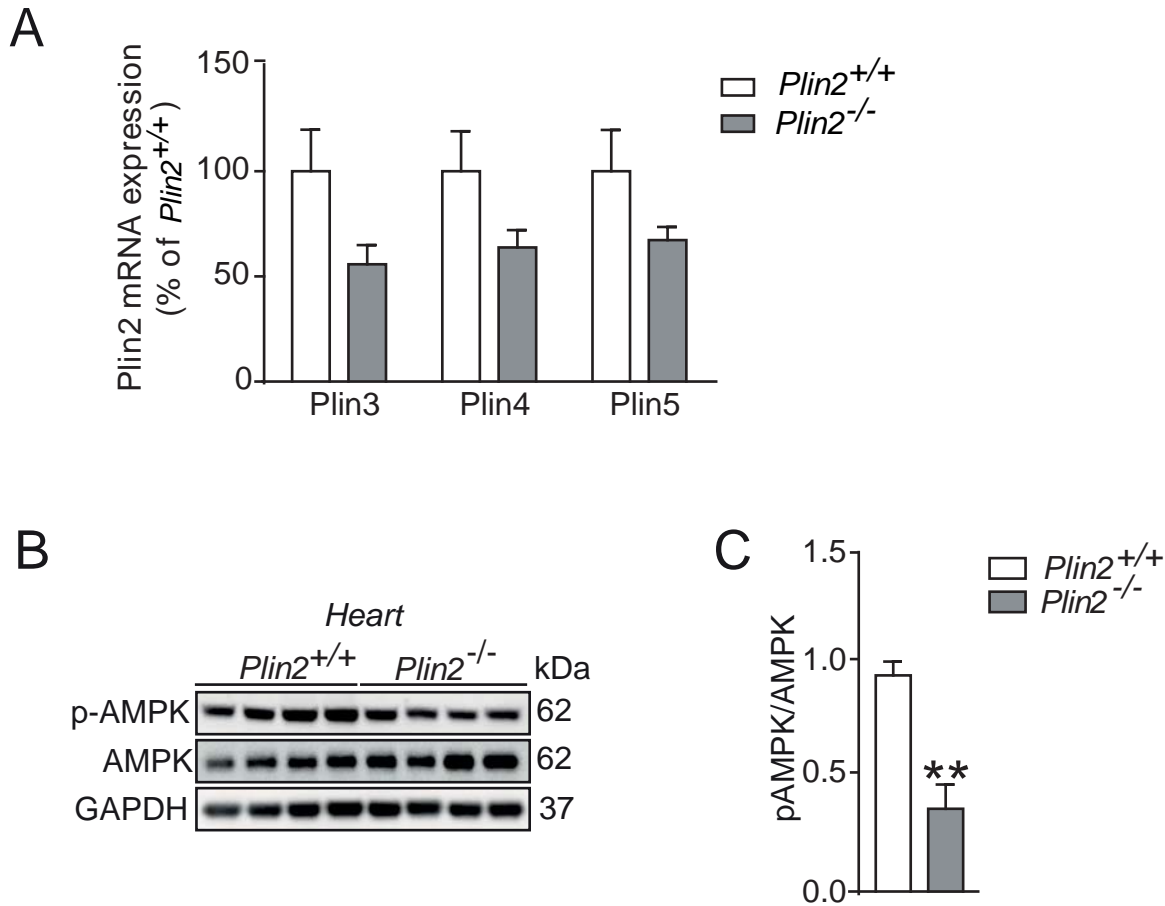

**Figure S6.** A) mRNA expression of Plin3, Plin4 and Plin5 in hearts of *Plin2*<sup>+/+</sup> and *Plin2*<sup>-/-</sup> mice. After a 4 hours fast (n=4-5). (B) Immunoblot analysis of p-AMPK and AMPK in lysates from *Plin2*<sup>+/+</sup> and *Plin2*<sup>-/-</sup> hearts after O/N fasting. Full-length blots are presented in Supplementary Figure S10. (C) Quantification of immunoblot analysis in C (n=4). Data presented as mean±SEM.

# Figure S7

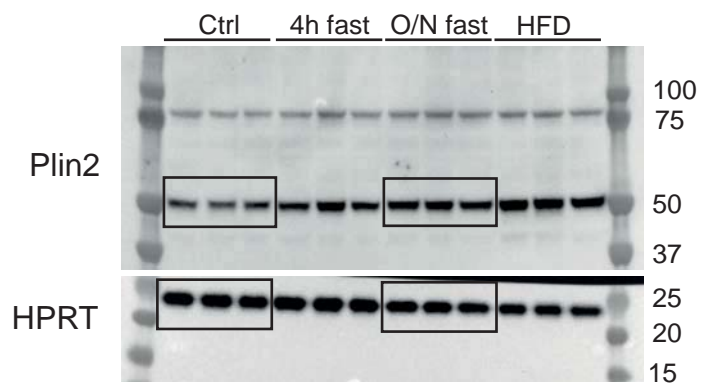

**Figure S7. Full western blots of Figure 1A used for quantification.**



# Figure S8

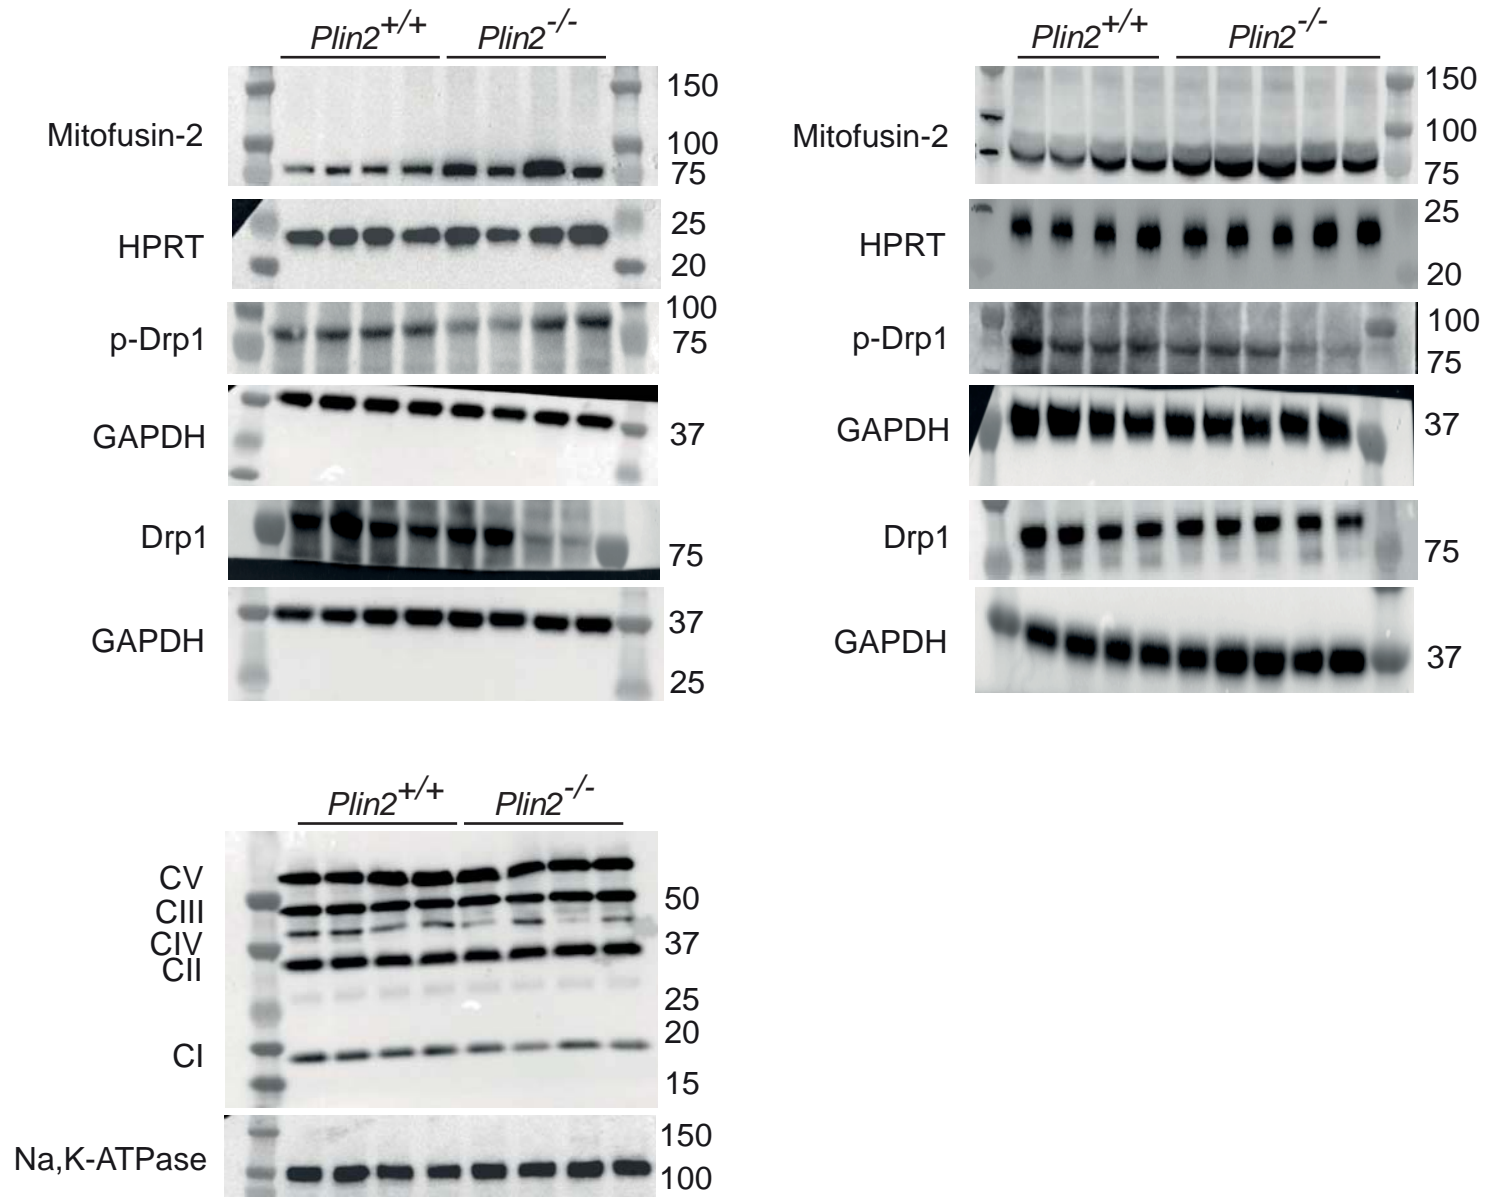

Figure S8. Full western blots of Figure 4D and F used for quantification.

# Figure S9

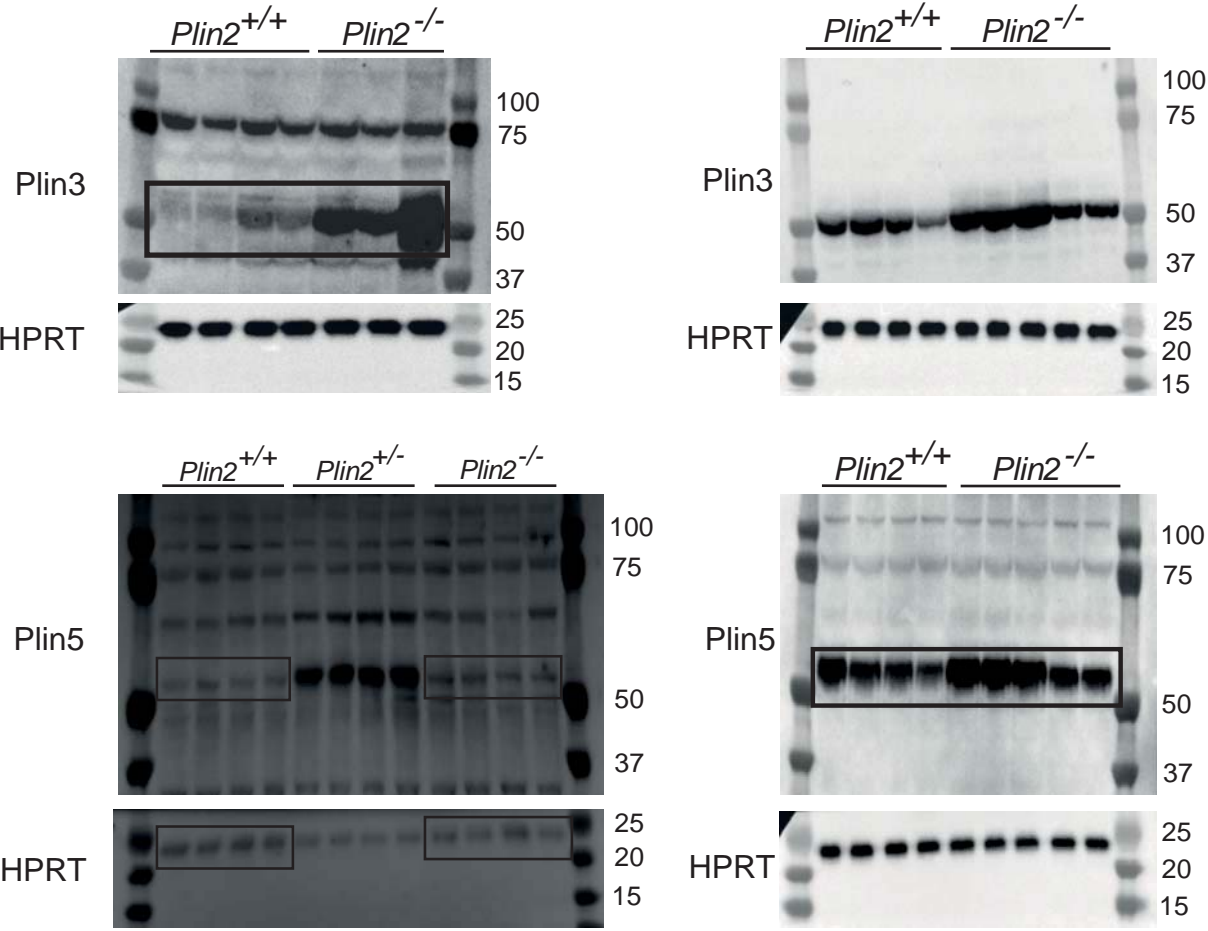

Figure S9. Full western blots of Figure 5A used for quantification.

# Figure S10

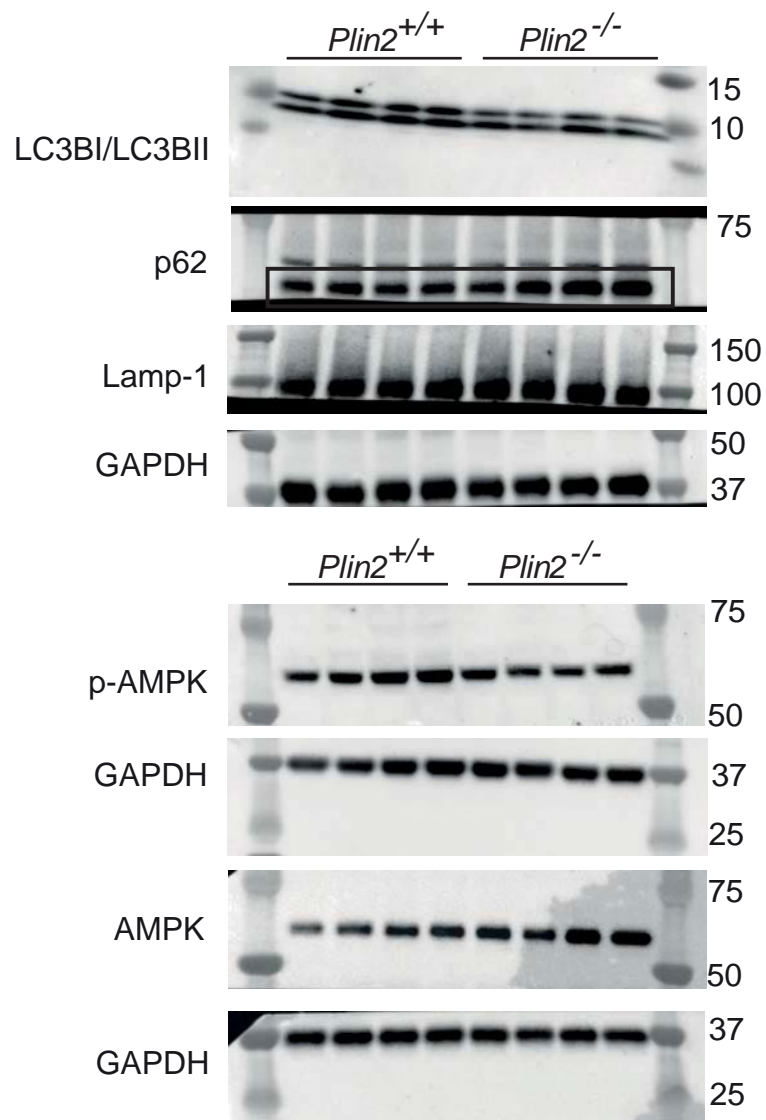

**Figure S10. Full western blots of Figure 6A and F and Figure S6B used for quantification.**

# Figure S11

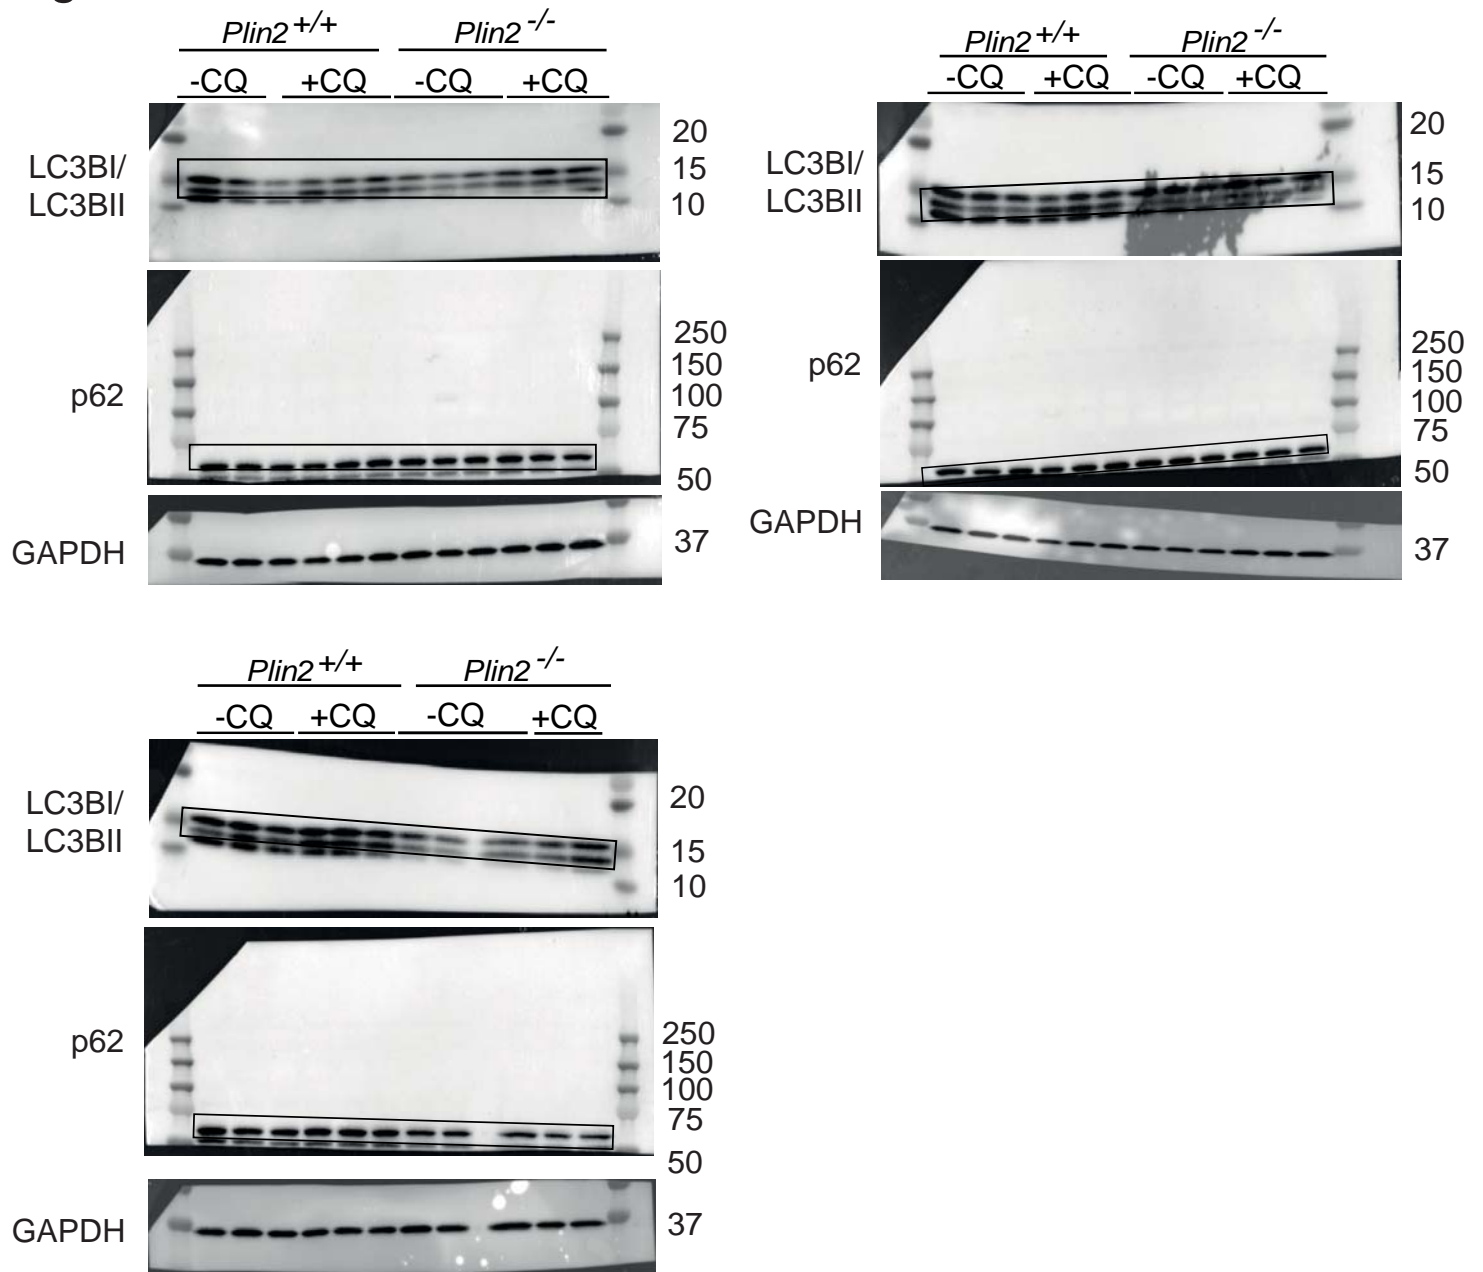

Figure S11. Full western blots of Figure 6C used for quantification.
